# Supplementary material
Source: PubMed Central journal article supplement (PMC4217423)
Supplement: pnas.201412767SI.pdf [file pnas.201412767SI.pdf]

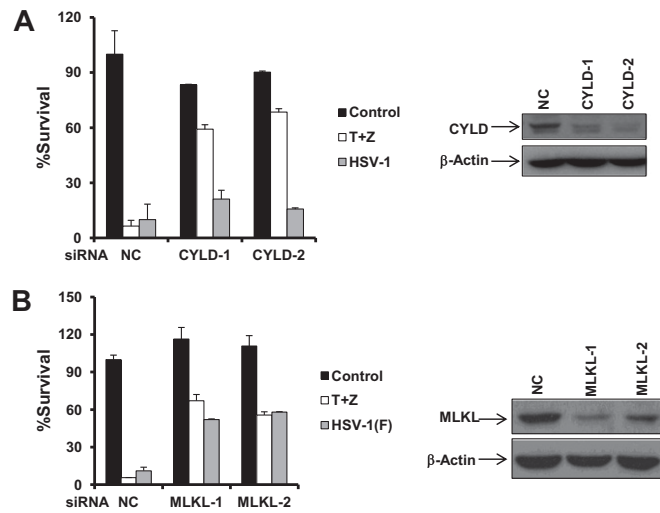

**Fig. 53.** HSV-1 infection-induced necrosis requires MLKL, but not CYLD. (A) L929 cells were transfected with NC or CYLD siRNA oligos. Forty-eight hours posttransfection, cells were treated as indicated for an additional 16–18 h. Cell-survival rate was determined by measuring ATP levels. Cell lysates were collected 48 h posttransfection and subjected to Western-blot analysis of CYLD and  $\beta$ -Actin levels. (B) L929 cells were transfected with NC or MLKL siRNA oligos. Forty-eight hours posttransfection, cells were treated as indicated for an additional 16–18 h. Cell-survival rate was determined by measuring ATP levels. Cell lysates were collected 48 h posttransfection and subjected to Western-blot analysis of MLKL and  $\beta$ -Actin levels.

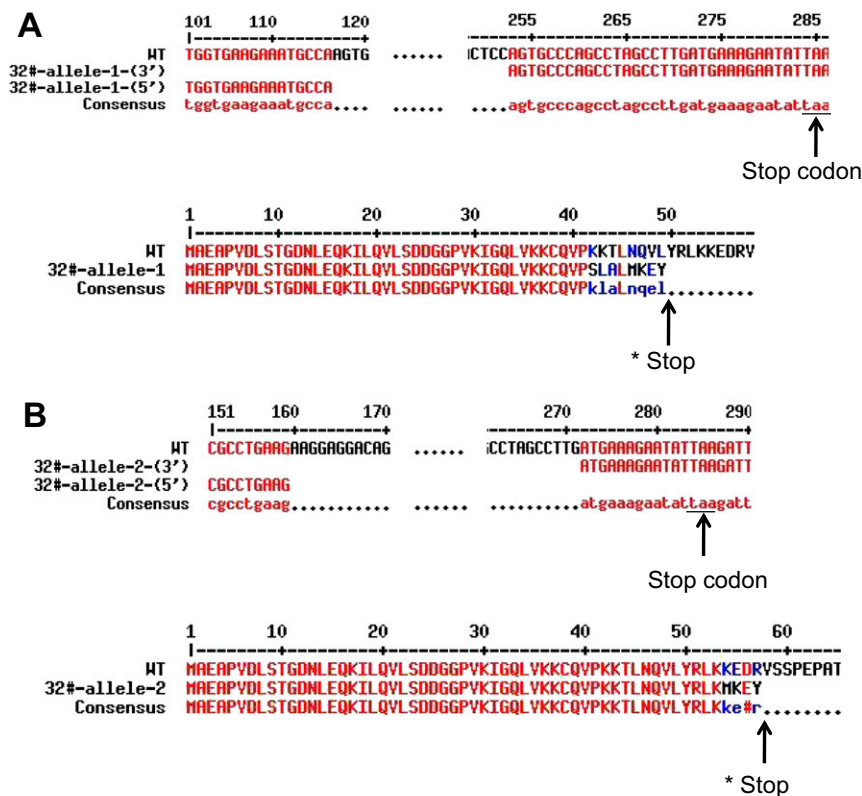

**Fig. 54.** Altered DAI DNA sequence shown in DAI KO clone 32#. (A) One allele of DAI KO clone 32# showed the inserted stop at residue 50. 32#-allele-1-(5'), N-terminal DNA sequence (1–116 bp) of DAI; 32#-allele-1-(3'), C-terminal DNA sequence (117–1,110 bp) of DAI. (B) The other allele of DAI KO clone 32# showed the inserted stop at residue 58. 32#-allele-2-(5'), N-terminal DNA sequence (1–159 bp) of DAI; 32#-allele-2-(3'), C-terminal DNA sequence (160–1,124 bp) of DAI.

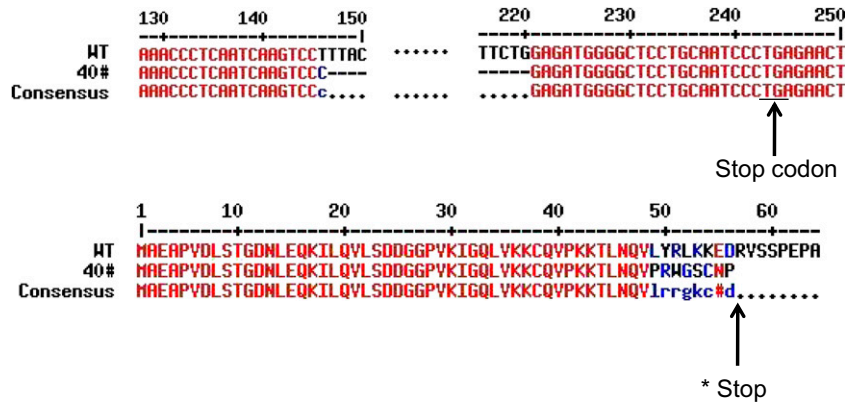

Fig. S5. Altered DAI DNA sequence shown in DAI KO clone 40#. This clone is a homozygous mutant with the inserted stop at residue 57.

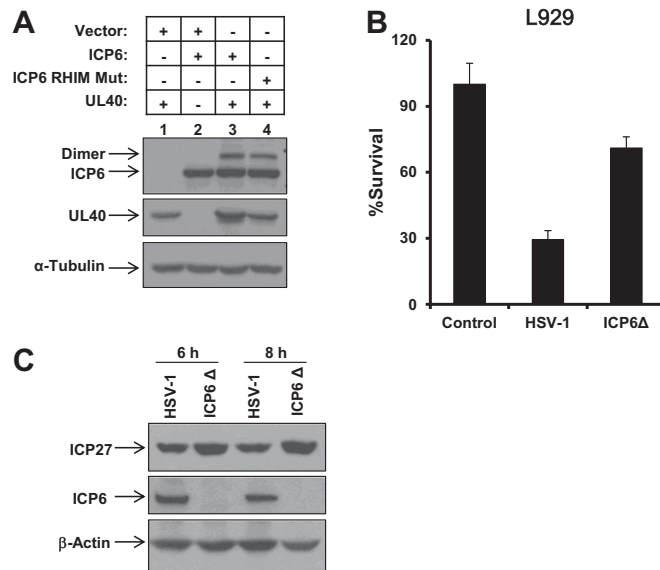

Fig. S6. Viral protein ICP6 interacts with RIP3 through its RHIM domain and is required for HSV-1-induced necrosis. (A) The 293T cells were transfected with DNA plasmids as indicated for 48 h. Cell lysates were collected and subjected to Western-blot analysis of ICP6, UL40, and  $\beta$ -Actin levels. (B) L929 cells were infected with HSV-1 or HSV-1 ICP6 $\Delta$  for 16–18 h. Cell-survival rate was determined by measuring ATP levels. (C) L929 cells were infected with HSV-1 or HSV-1 ICP6 $\Delta$  for the indicated time. Cell lysates were collected and subjected to Western-blot analysis of ICP6, ICP27, and  $\beta$ -Actin levels.
